# Supplementary material
Source: publisher figshare collection journal article supplement (https://gsajournals.figshare.com/ndownloader/files/26403790)
Supplement: Supplementary file 1 [file 26403790]

**Table S2. Log2 fold change (L2FC) of gene expression comparing nCounter values with results obtained by RNAseq.** CPET/CET – polymicrobial biofilms of *C. albicans* and *Pseudomonas aeruginosa* compared to single species biofilms of *C. albicans*;

| Gene name | ORF | Polymicrobial vs monomicrobial biofilms | |
| --- | --- | --- | --- |
| **nCounter** | **RNAseq** |
| **ACT1* | orf19.5007 | -0.01 | -0.41 |
| **TDH3* | orf19.6814 | -0.22 | 0.14 |
| **LSC2* | orf19.1860 | 0.24 | 0.13 |
| *CDR1* | orf19.6000 | 1.53 | 1.46 |
| *CDR2* | orf19.5958 | 0.57 | 1.39 |
| *PDR16* | orf19.1027 | 1.97 | 1.89 |
| *FCR1* | orf19.6817 | 2.95 | 2.60 |
| *MDR1* | orf19.5604 | 3.75 | 2.02 |
| *RTA3* | orf19.23 | 5.78 | 5.62 |
| *IPT1* | orf19.4769 | 1.33 | 1.16 |
| *NRG1* | orf19.7150 | 0.42 | -0.01 |
| *TAC1* | orf19.3188 | 1.18 | 0.61 |
| *UPC2* | orf19.391 | 1.04 | 1.66 |
| *SUT1* | orf19.4342 | 2.88 | 2.72 |
| *TYE7* | orf19.4941 | 1.77 | 1.16 |
| *EHT1* | orf19.3040 | 2.48 | 2.83 |
| *YWP1* | orf19.3618 | 0.26 | 1.18 |
| *HSP12* | orf19.3160 | 1.03 | 0.72 |
| *CSR1* | orf19.3794 | -1.05 | -1.37 |
| *SAP6* | orf19.5542 | 1.54 | 1.45 |
| *WOR1* | orf19.4884 | 1.38 | 2.84 |
| *SET3* | orf19.7221 | 2.05 | 2.11 |

*Reference genes used for normalisation of mRNA transcript counts.
